# Supplementary material for: Anti-Osteoporotic Effects of Combined Extract of Lycii Radicis Cortex and Achyranthes japonica in Osteoblast and Osteoclast Cells and Ovariectomized Mice
Source: PubMed Central journal article supplement (PMC6893723; doi:10.3390/nu11112716), 2019-11-09
Supplement: nutrients-11-02716-s001.pdf [file nutrients-11-02716-s001.pdf]

## Anti-Osteoporotic Effects of combined extract of *Lycii Radicis Cortex* and *Achyranthes japonica* in Osteoblast and Osteoclast Cells and Ovariectomized Mice

Eunkuk Park, Jeonghyun Kim, Subin Yeo, Chun Whan Choi, Sang Woo Lee, Wan Yi Li, Ji-Won Lee, Jin-Hyok Park, Dam Huh and Seon-Yong Jeong

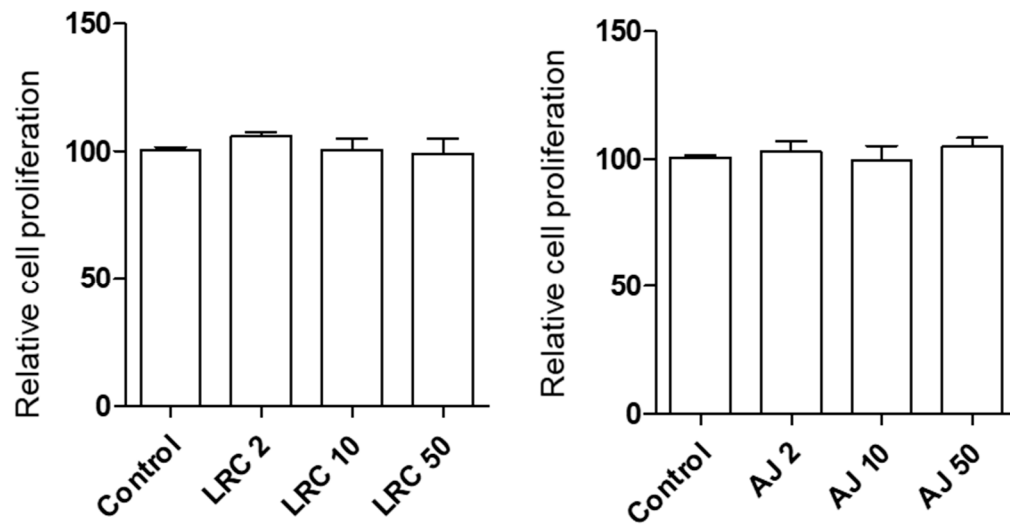

**Figure. S1.** Effects of LRC and AJ extracts on cell proliferation in preosteoblast MC3T3-E1 cells. Cells were treated with ascorbic acid (50 µg/ml) and β-glycerophosphate (10 mM) and cultured with three different concentrations (2, 10 and 50 µg/ml) and cell proliferation was assessed by WST.

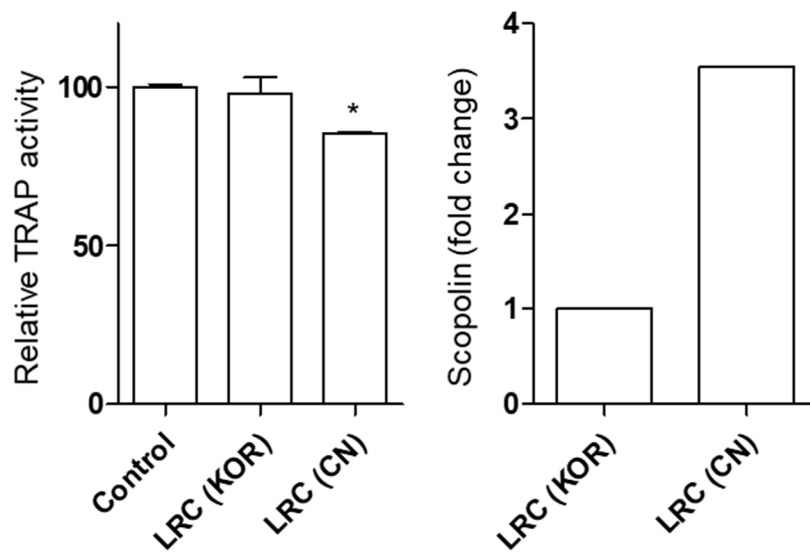

**Figure. S2.** Effect of LRC extracts from Korean (KOR) or Chinese (CN) plants on osteoclast differentiation of primary-cultured monocytes. Fold change in scopolin concentration.

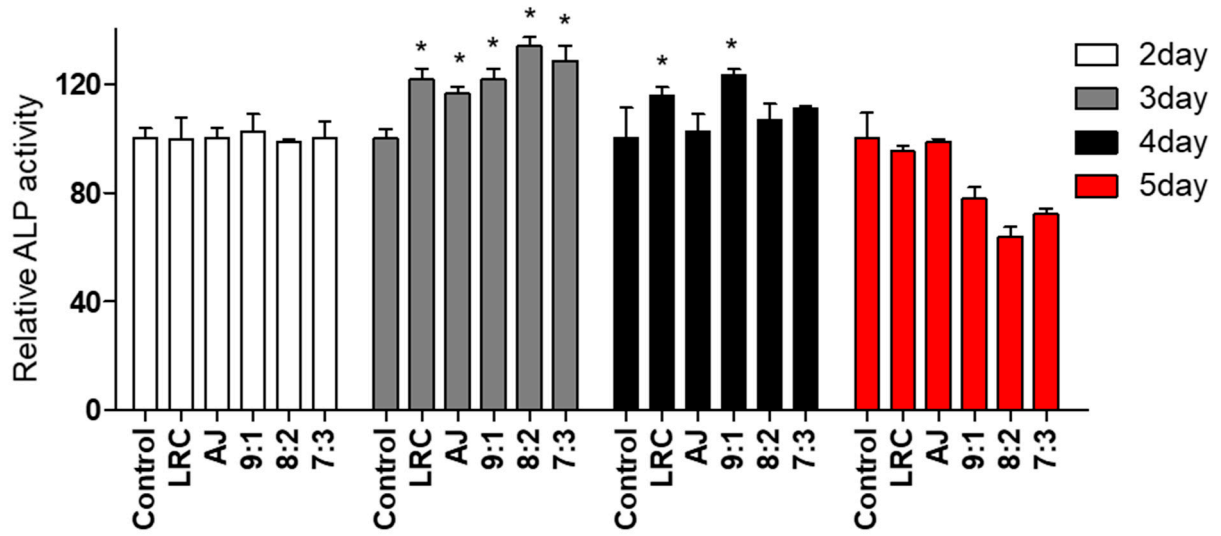

**Figure. S3.** Effects of single or combined LRC and AJ extract on alkaline phosphatase (ALP) activity in the osteoblast-lineage cell lines. Cells were treated with ascorbic acid (50  $\mu\text{g}/\text{ml}$ ) and  $\beta$ -glycerophosphate (10 mM) and incubated with 10  $\mu\text{g}/\text{ml}$  of single or combined LRC and AJ extracts (9:1, 8:2 or 7:3), and an ALP activity assay was assessed at 2, 3, 4, and 5 days. Control: non-treated cells. \*:  $p < 0.05$  vs. control.

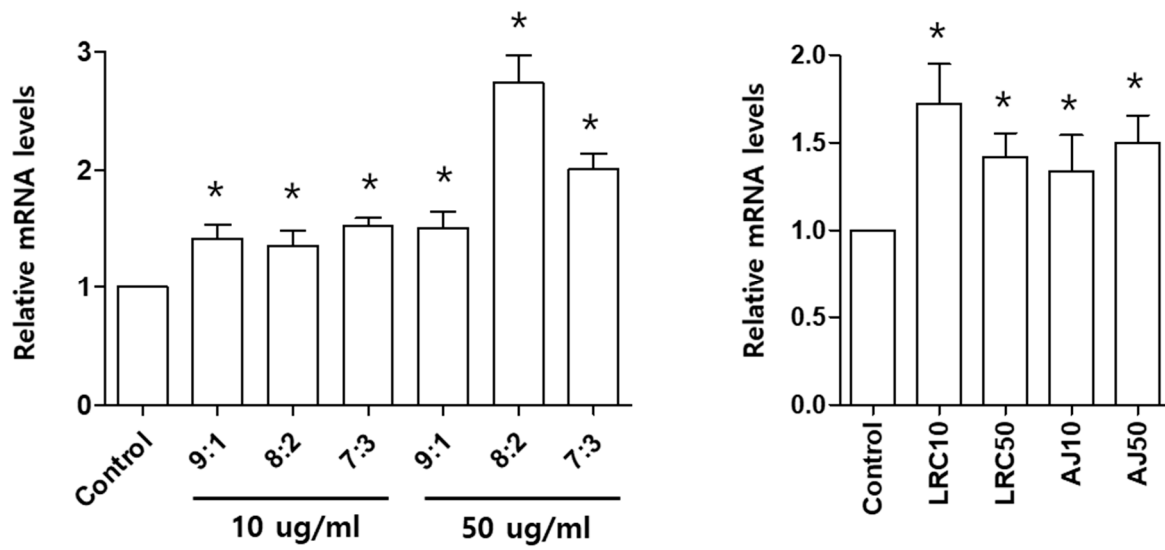

**Figure. S4.** Effects of single or combined LRC and AJ extract on mRNA expression of *Bglap*. Cells were treated with single extracts of LRC and AJ and combined LRC and AJ. The mRNA expression of *Bglap* was measured by RT-PCR. Control: non-treated cells. \*:  $p < 0.05$  vs. Control.

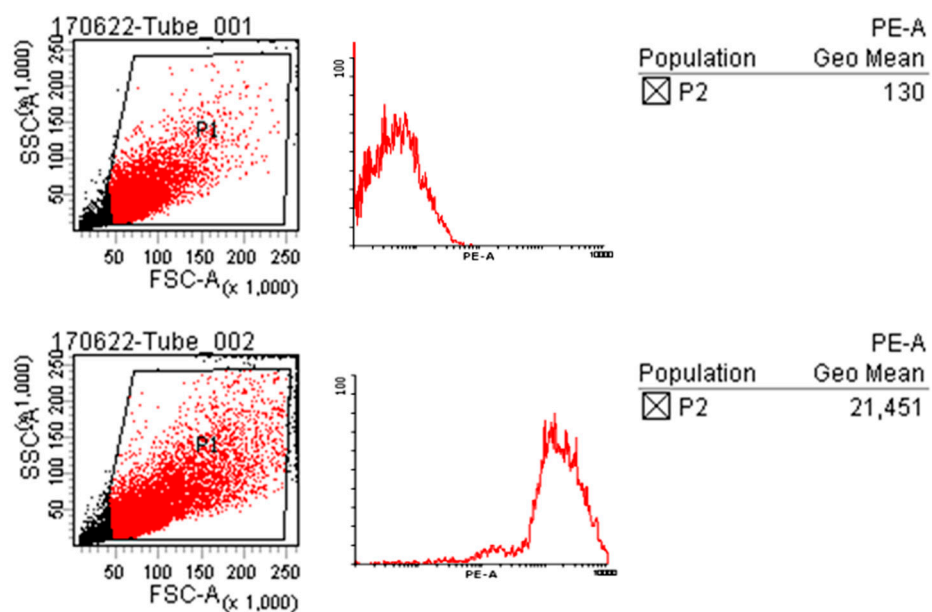

**Figure. S5.** The validation of the successful isolation of monocytes from mouse bone marrow. Primary-cultured monocytes were identified by an immunophenotypic analysis with a monocyte-specific surface positive marker (PE-conjugated CD11b antibody) using a fluorescence-activated cell sorting analysis.

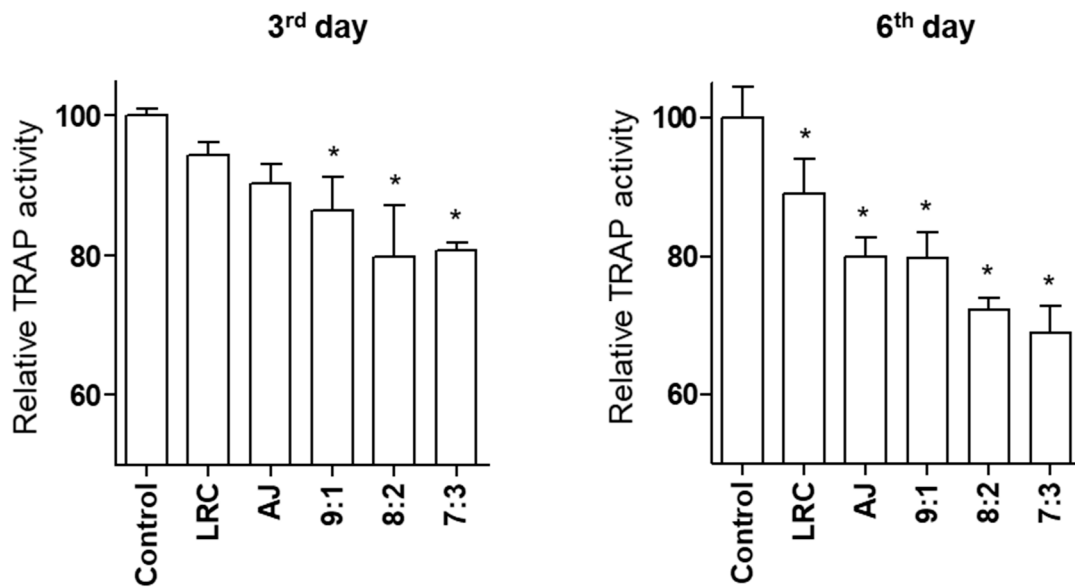

**Figure. S6.** Effects of single or combined LRC and AJ extract on osteoclast differentiation of primary-cultured monocytes. After induction of osteoclast differentiation by treatment of 30 ng/ml of M-CSF and 50 ng/ml of RANKL (Induction), cells were co-treated with single extracts of LRC and AJ and combined LRC and AJ for 3 and 6 days, and tartrate-resistant acid phosphatase (TRAP) activity was assessed. \*:  $p < 0.05$  vs. Induction.

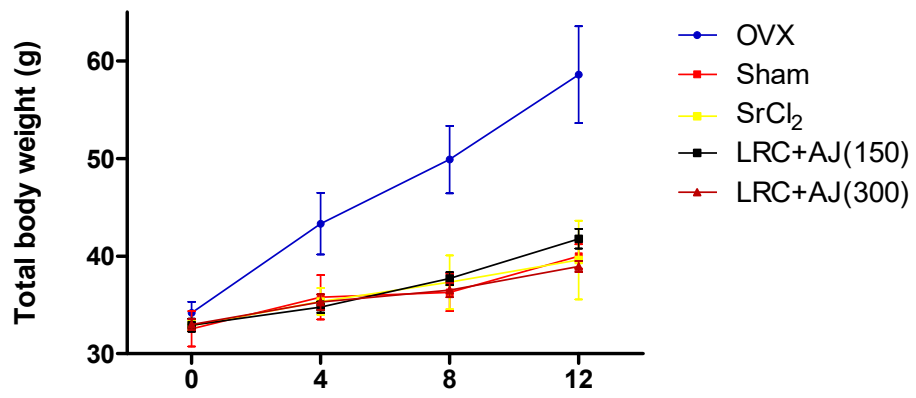

**Figure. S7.** Changes of total body weight for 12 weeks in non-surgery mice
